# Supplementary material for: Analyses of Basal and Squamous Cell Carcinoma Reported as an Adverse Drug Reaction and Comparison with Cases from the Cancer Registry from Germany
Source: Springer Nature journal article supplement (doi:10.1007/s40268-022-00407-1), 2022-11-19
Supplement: MOESM1 [file 24096962]

Online Resource 1. Sex-stratified analyses of tumor location of BCC and SCC.

Title:

**Analyses of Basal and Squamous Cell Carcinoma Reported as an Adverse Drug Reaction and Comparison with Cases from the Cancer Registry from Germany**

Journal:

Drugs R&D

Authors' names:

Dubrall D.<sup>1,2</sup>, Sachs B.<sup>2,3</sup>, Kraywinkel K<sup>4</sup>, Schulz M.<sup>5</sup>, Schmid M.<sup>1</sup> Fischer-Barth W<sup>2</sup>,  
Bate J<sup>2,6</sup>

Authors' institutional affiliations including city and country

- 1) Institute for Medical Biometry, Informatics and Epidemiology, University Hospital of Bonn, Bonn, Germany.
- 2) Federal Institute for Drugs and Medical Devices, Bonn, Germany.
- 3) Department for Dermatology and Allergy, University Hospital Aachen, Aachen, Germany.
- 4) Robert Koch Institute, Berlin, Germany.
- 5) Central Research Institute of Ambulatory Health Care in Germany, Berlin, Germany.
- 6) Institute for Transfusion Medicine, Cologne Municipal Hospitals, Cologne, Germany

Corresponding author:

Dr. Diana Dubrall

Diana.Dubrall@bfarm.de

Table 1) sex-stratified analysis of tumor locations of BCCs.

|                                         | <b>Female: BCC reports (n= 108)</b> | <b>Male: BCC reports (n= 79)</b> | <b>Female: Cases of BCC in the German Cancer Registry (n= 617,219.)</b> | <b>Male: Cases of BCC in the German Cancer Registry (n= 649,991)</b> |
|-----------------------------------------|-------------------------------------|----------------------------------|-------------------------------------------------------------------------|----------------------------------------------------------------------|
| <b>Location of tumors</b>               |                                     |                                  |                                                                         |                                                                      |
| <b>Cases with information</b>           | 50.0% (n= 54)                       | 63.3% (n= 50)                    | 90.4% (n= 557,730)                                                      | 90.2% (n= 586,412)                                                   |
| <b>Lips</b>                             | 1.9% (1/54)                         | 0.0% (0/50)                      | 2.8% (n= 15,801)                                                        | 1.3% (n= 7,497)                                                      |
| <b>Eye/eyelid</b>                       | 1.9% (1/54)                         | 10.0% (5/50)                     | 6.9% (n= 38,531)                                                        | 4.7% (n= 27,830)                                                     |
| <b>Ear and auditory canal</b>           | 3.7% (2/54)                         | 10.0% (5/50)                     | 1.8% (n=10,119)                                                         | 6.1% (n= 35,996)                                                     |
| <b>Other part of the face</b>           | 51.9% (28/54)                       | 46.0% (23/50)                    | 46.9% (n= 261,668)                                                      | 42.9% (n= 251,731)                                                   |
| <b>Scalp and neck</b>                   | 7.4% (4/54)                         | 10.0% (5/50)                     | 7.7 (n= 42,817)                                                         | 8.8% (n= 51,324)                                                     |
| <b>Trunk</b>                            | 29.6% (16/54)                       | 16.0% (8/50)                     | 19.2% (n= 107,347)                                                      | 21.5% (n= 125,902)                                                   |
| <b>Upper extremities incl. shoulder</b> | 14.8% (8/54)                        | 10.0% (5/50)                     | 7.2% (n= 40,305)                                                        | 9.7% (n= 56,613)                                                     |
| <b>Lower extremities incl. hips</b>     | 3.7% (2/54)                         | 10.0% (5/50)                     | 6.7% (n=37,299)                                                         | 4.5% (n= 26,359)                                                     |
| <b>Overlapping</b>                      | 0.0% (0/54)                         | 0.0% (0/50)                      | 0.4% (n= 2,152)                                                         | 0.5% (n= 2,789)                                                      |
| <b>Oral cavity</b>                      | 0.0% (0/54)                         | 0.0% (0/50)                      | 0.0% (n= 3)                                                             | 0.0% (n= 5)                                                          |
| <b>Vulva</b>                            | 0.0% (0/54)                         | -                                | 0.3% (n= 1,688)                                                         | -                                                                    |
| <b>Penis</b>                            | -                                   | 2.0% (1/50)                      | -                                                                       | 0.1% (n= 366)                                                        |

Table 2) sex-stratified analysis of tumor locations of SCCs.

|                                         | <b>Female: SCC reports (n= 22)</b> | <b>Male: SCC reports (n= 50)</b> | <b>Female: Cases of SCC in the German Cancer Registry (n= 198,359)</b> | <b>Male: Cases of SCC in the German Cancer Registry (n= 278,544)</b> |
|-----------------------------------------|------------------------------------|----------------------------------|------------------------------------------------------------------------|----------------------------------------------------------------------|
| <b>Location of tumors</b>               |                                    |                                  |                                                                        |                                                                      |
| <b>Cases with information</b>           | 86.4% (n= 19)                      | 64.0% (n= 32)                    | 94.8% (n= 188,059)                                                     | 94.6% (n= 263,506)                                                   |
| <b>Lips</b>                             | 5.3% (1/19)                        | 9.4% (3/32)                      | 3.9% (n= 7,360)                                                        | 4.2% (n= 11,184)                                                     |
| <b>Eye/eyelid</b>                       | 5.3% (1/19)                        | 12.5% (4/32)                     | 2.1% (n= 3,877)                                                        | 1.4% (n= 3,724)                                                      |
| <b>Ear and auditory canal</b>           | 0.0% (0/19)                        | 9.4% (3/32)                      | 1.8% (n=3,313)                                                         | 12.7% (n= 33,450)                                                    |
| <b>Other part of the face</b>           | 36.8% (7/19)                       | 43.8% (14/32)                    | 37.7% (n= 70,820)                                                      | 29.0% (n= 76,305)                                                    |
| <b>Scalp and neck</b>                   | 5.3% (1/19)                        | 15.6% (5/32)                     | 3.8% (n= 7,134)                                                        | 15.1% (n= 39,855)                                                    |
| <b>Trunk</b>                            | 5.3% (1/19)                        | 12.5% (4/32)                     | 5.6% (n= 10,453)                                                       | 4.6% (n= 12,217)                                                     |
| <b>Upper extremities incl. shoulder</b> | 26.3% (5/19)                       | 9.4% (3/32)                      | 11.9% (n= 22,393)                                                      | 9.1% (n= 24,100)                                                     |
| <b>Lower extremities incl. hips</b>     | 21.1% (4/19)                       | 12.5% (4/32)                     | 6.3% (n= 11,904)                                                       | 2.9% (n= 7,606)                                                      |
| <b>Overlapping</b>                      | 0.0% (0/19)                        | 0.0% (0/32)                      | 0.1% (n= 279)                                                          | 0.2% (n= 559)                                                        |
| <b>Oral cavity</b>                      | 0.0% (0/19)                        | 0.0% (0/32)                      | 11.0% (n= 20,753)                                                      | 17.4% (n= 45,766)                                                    |
| <b>Vulva</b>                            | 10.5% (2/19)                       | -                                | 15.8% (n= 29,773)                                                      | -                                                                    |
| <b>Penis</b>                            | -                                  | 9.4% (3/32)                      | -                                                                      | 3.3% (n= 8,740)                                                      |
